# Supplementary material for: Integrating single-cell and bulk sequencing data to identify glycosylation-based genes in non-alcoholic fatty liver disease-associated hepatocellular carcinoma
Source: PeerJ journal article supplement (doi:10.7717/peerj.17002), 2024-03-18

(A)

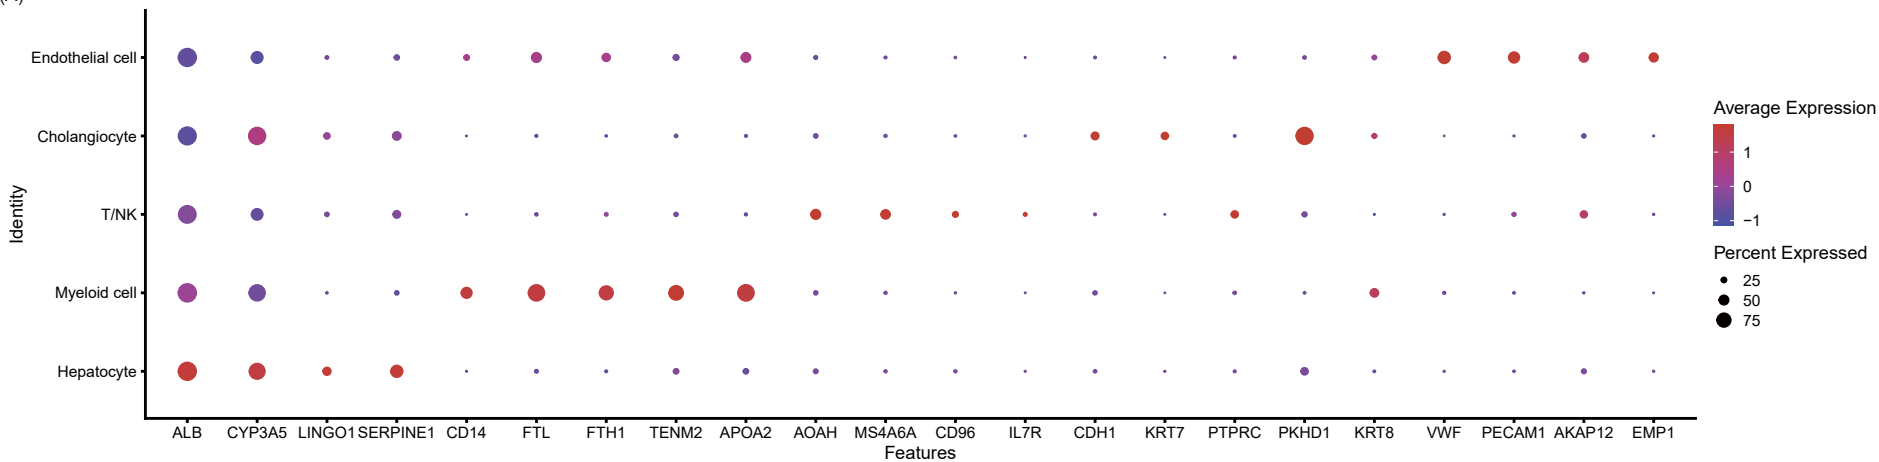

(B)

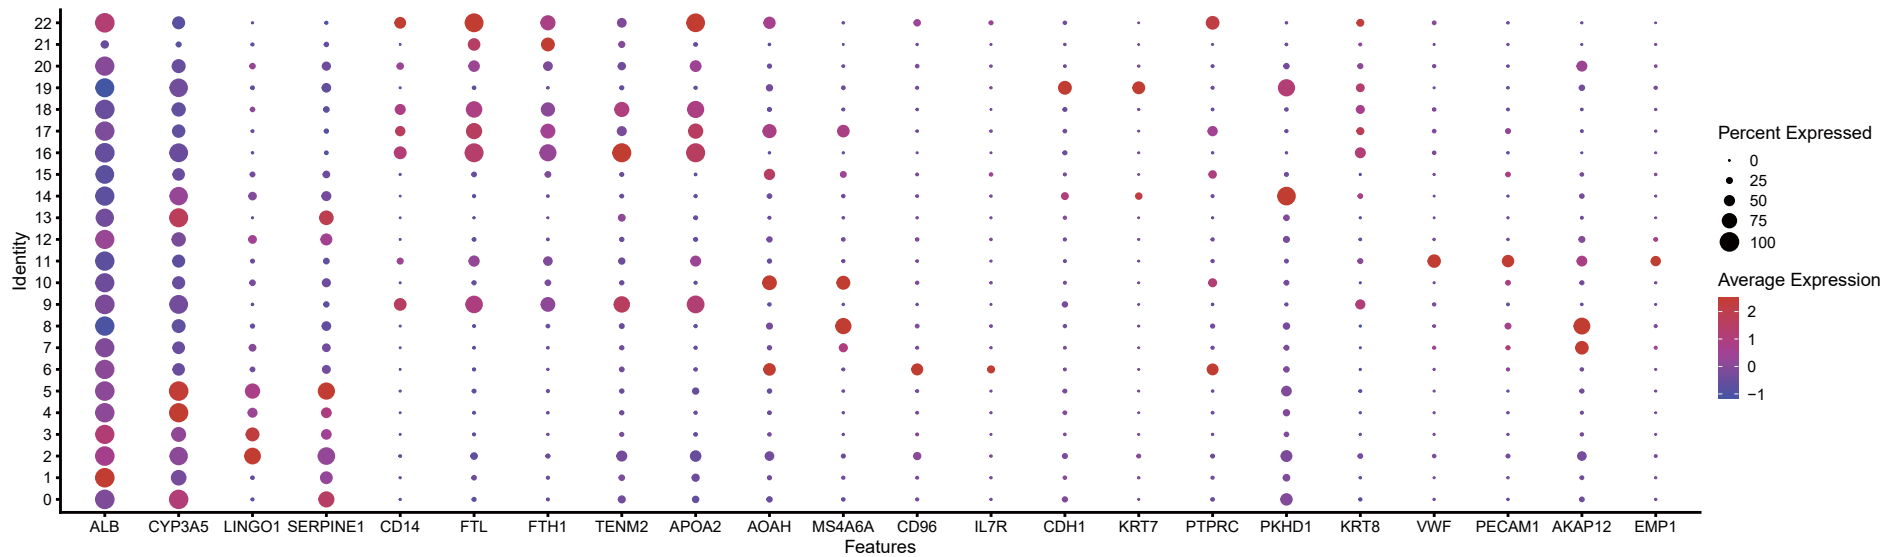

Supplement: FigureS2.pdf [file FigureS2.pdf]
