# Supplementary material for: Integrating single-cell and bulk sequencing data to identify glycosylation-based genes in non-alcoholic fatty liver disease-associated hepatocellular carcinoma
Source: PeerJ journal article supplement (doi:10.7717/peerj.17002), 2024-03-18

Cancer.type (p&lt;0.001)

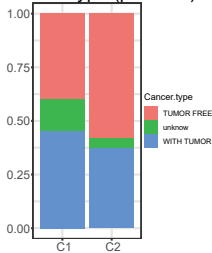

Child.grade (p=0.050)

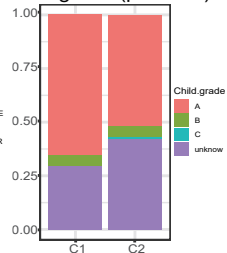

Gender (p=0.001)

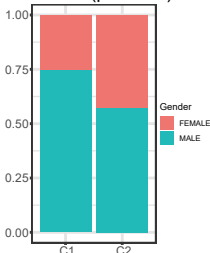

Grade (p&lt;0.001)

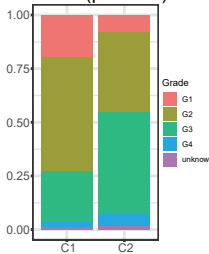

History (p=0.024)

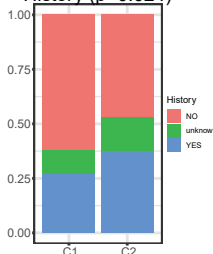

TNM:Node (p=0.022)

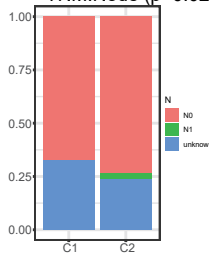

Stage (p&lt;0.001)

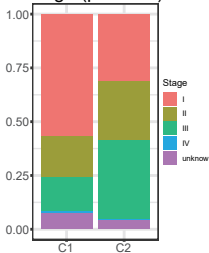

TNM:Tumor (p&lt;0.001)

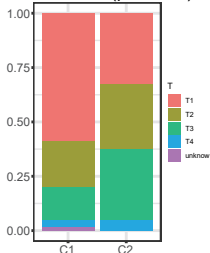

Vascular (p=0.006)

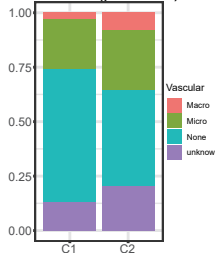

Supplement: FigureS6.pdf [file FigureS6.pdf]
