# Supplementary material for: Integrating single-cell and bulk sequencing data to identify glycosylation-based genes in non-alcoholic fatty liver disease-associated hepatocellular carcinoma
Source: PeerJ. 2024 Mar 18;12:e17002. doi: 10.7717/peerj.17002 (PMC10956522; doi:10.7717/peerj.17002)
Supplement: Supplemental Information 10 [file peerj-12-17002-s010.xlsx]

## Sheet: table_name
S1. glycosylation-related genes.
S2. differential genes between the high and low G-score group in scRNA-seq dataset.
S3.Turquoise Module and Gray Module Gene List
S4. The primer sequences utilized in RT-PCR.
S4. The primer sequences utilized in RT-PCR.

## Sheet:  Supplmentray_table_1
glycosylation-related genes
A4GNT
ABCA2
ACAN
ACER2
ACTR10
ACTR1A
ADAMTS1
ADAMTS10
ADAMTS12
ADAMTS13
ADAMTS14
ADAMTS15
ADAMTS16
ADAMTS17
ADAMTS18
ADAMTS19
ADAMTS2
ADAMTS20
ADAMTS3
ADAMTS4
ADAMTS5
ADAMTS6
ADAMTS7
ADAMTS8
ADAMTS9
ADAMTSL1
ADAMTSL2
ADAMTSL3
ADAMTSL4
ADAMTSL5
AGER
AGRN
ALG1
ALG10
ALG10B
ALG11
ALG12
ALG13
ALG14
ALG2
ALG3
ALG5
ALG6
ALG8
ALG9
AMDHD2
AMFR
ANK1
ANK2
ANK3
ANKRD28
APOB
APP
ARCN1
AREG
ARF1
ARF3
ARF4
ARF5
ARFGAP1
ARFGAP2
ARFGAP3
ARFGEF1
ARL6IP1
ARSB
ASGR1
ASGR2
ATP6AP2
ATP6V0A2
ATP6V1A
ATP6V1E1
B3GALNT2
B3GALT1
B3GALT2
B3GALT6
B3GAT3
B3GLCT
B3GNT2
B3GNT3
B3GNT4
B3GNT5
B3GNT6
B3GNT7
B3GNT8
B3GNT9
B3GNTL1
B4GALNT2
B4GALT1
B4GALT2
B4GALT3
B4GALT4
B4GALT5
B4GALT6
B4GALT7
B4GAT1
BCAN
BET1
BET1L
BGLAP
BGN
C1GALT1
C1GALT1C1
C1GALT1C1L
CA4
CAD
CALR
CANX
CAPZA1
CAPZA2
CAPZA3
CAPZB
CASQ1
CCDC115
CCDC47
CD55
CD59
CDKAL1
CFP
CGA
CHP1
CHST10
CHST14
CHST3
CHST4
CHST6
CHST8
CHSY1
CKAP4
CMAS
CNIH1
CNIH2
CNIH3
COG1
COG2
COG3
COG4
COG5
COG6
COG7
COG8
COL7A1
COPA
COPB1
COPB2
COPE
COPG1
COPG2
COPZ1
COPZ2
CRPPA
CSNK1D
CSPG4
CSPG5
CTSA
CTSC
CTSZ
CYBB
DAD1
DAG1
DCN
DCTN1
DCTN2
DCTN3
DCTN4
DCTN5
DCTN6
DDOST
DERL1
DERL2
DERL3
DHDDS
DNAJC3
DOLK
DOLPP1
DPAGT1
DPM1
DPM2
DPM3
DPY19L1
DPY19L2
DPY19L3
DPY19L4
DYNC1H1
DYNC1I1
DYNC1I2
DYNC1LI1
DYNC1LI2
DYNLL1
DYNLL2
EDEM1
EDEM2
EDEM3
EDN1
ENGASE
ENTPD5
EOGT
EPHA5
ERP29
EXT1
EXT2
F12
F5
F8
FCSK
FKRP
FKTN
FMOD
FOLR1
FPGT
FTCD
FUCA1
FUOM
FUT3
FUT4
FUT5
FUT6
FUT7
FUT8
FUT9
GABARAP
GAL3ST1
GALE
GALK1
GALNT1
GALNT10
GALNT11
GALNT12
GALNT13
GALNT14
GALNT15
GALNT16
GALNT17
GALNT18
GALNT2
GALNT3
GALNT4
GALNT5
GALNT6
GALNT7
GALNT8
GALNT9
GALNTL5
GALNTL6
GALT
GANAB
GBA2
GBF1
GCC1
GCNT1
GCNT3
GCNT4
GCNT7
GFPT1
GFPT2
GFUS
GLB1
GMDS
GMPPA
GMPPB
GNE
GNPNAT1
GNRH1
GOLGA2
GOLGB1
GORASP1
GOSR1
GOSR2
GPC1
GPC2
GPC3
GPC4
GPC5
GPC6
GRIA1
GXYLT1
GXYLT2
HCRT
HEXA
HEXB
HGFAC
HID1
HM13
HMGB1
HSD3B1
HSD3B2
HSPA5
HSPG2
HTR5A
HYOU1
IL15
INS
KCNJ2
KDELR1
KDELR2
KDELR3
KERA
KRTCAP2
LARGE1
LARGE2
LFNG
LGALS3
LHB
LIN28A
LMAN1
LMAN1L
LMAN2
LMAN2L
LRAT
LRPAP1
LUM
MACO1
MAGT1
MAN1A1
MAN1A2
MAN1B1
MAN1C1
MAN2A1
MAN2A2
MAN2B1
MAN2C1
MANEA
MAPK1
MAPK3
MARCHF6
MCFD2
MGAT1
MGAT2
MGAT3
MGAT4A
MGAT4B
MGAT4C
MGAT4D
MGAT5
MGAT5B
MIA2
MIA3
MLEC
MOGS
MPDU1
MPI
MT3
MTTP
MUC1
MUC12
MUC13
MUC15
MUC16
MUC17
MUC19
MUC2
MUC20
MUC21
MUC3A
MUC4
MUC5AC
MUC5B
MUC6
MUC7
MUCL1
MVD
MYO1D
MYOC
NAGK
NANP
NANS
NAPA
NAPB
NAPG
NAT8L
NCAN
NCF1
NEU1
NEU2
NEU3
NEU4
NGLY1
NOTCH1
NOTCH2
NOTCH3
NOTCH4
NPL
NSF
NUCB1
NUDT14
NUS1
OGA
OGN
OGT
OMD
OS9
OST4
OSTC
P2RX3
PAPSS2
PCSK9
PDIA3
PGM1
PGM3
PGRMC1
PI4KB
PKM
PLCB4
PLOD1
PLOD2
PLOD3
PMM1
PMM2
POFUT1
POFUT2
POGLUT1
POGLUT2
POGLUT3
POMGNT1
POMGNT2
POMK
POMT1
POMT2
PPP6C
PPP6R1
PPP6R3
PRDX4
PREB
PRELP
PRKCSH
PSEN1
PSMC1
PTGDS
RAB14
RAB1A
RAB1B
RAD23B
RAMP1
RANGRF
RENBP
RFT1
RNF103
RNF139
RNF185
RNF5
RP9
RPL10
RPL18
RPL27
RPL4
RPL6
RPN1
RPN2
RPS21
RPS23
RPS26
RPS27A
RPS28
RPS29
RXYLT1
RYR1
RYR2
RYR3
S100A12
S100B
SAA1
SAR1B
SBSPON
SCFD1
SCGB1A1
SDC1
SDC2
SDC3
SDC4
SDF2L1
SEC13
SEC16A
SEC16B
SEC22A
SEC22B
SEC22C
SEC23A
SEC23IP
SEC24A
SEC24B
SEC24C
SEC24D
SEC31A
SEC61A1
SEC61A2
SEC61B
SEC61G
SEC62
SEC63
SEL1L
SEMA5A
SEMA5B
SERPINA1
SFTPA1
SFTPA2
SFTPD
SGMS1
SLC17A5
SLC26A2
SLC35A1
SLC35A2
SLC35C1
SLC35C2
SLC39A8
SLC51B
SLC7A11
SLMAP
SPON1
SPON2
SPPL3
SPTA1
SPTAN1
SPTB
SPTBN1
SPTBN2
SPTBN4
SPTBN5
SRD5A3
SRI
SRP9
SRPRA
SRPRB
SSPOP
SSR4
ST3GAL1
ST3GAL2
ST3GAL3
ST3GAL4
ST3GAL5
ST3GAL6
ST6GAL1
ST6GAL2
ST6GALNAC1
ST6GALNAC2
ST6GALNAC3
ST6GALNAC4
ST6GALNAC5
ST6GALNAC6
ST8SIA1
ST8SIA2
ST8SIA3
ST8SIA4
ST8SIA5
ST8SIA6
STAU1
STT3A
STT3B
STX17
STX5
SUCO
SVIP
SYNE3
SYVN1
TBC1D20
TET1
TET2
TET3
TFG
TGFA
TH
THBS1
THBS2
THSD1
THSD4
THSD7A
THSD7B
TMCC1
TMED10
TMED2
TMED3
TMED7
TMED9
TMEM115
TMEM165
TMEM199
TMEM258
TMEM59
TMEM97
TMTC1
TMTC2
TMTC3
TMTC4
TP63
TRAK1
TRAK2
TRAPPC1
TRAPPC10
TRAPPC2
TRAPPC2L
TRAPPC3
TRAPPC4
TRAPPC5
TRAPPC6A
TRAPPC6B
TRAPPC9
TRIM13
TTYH1
TUBA1A
TUBA1B
TUBA1C
TUBA3C
TUBA3D
TUBA3E
TUBA4A
TUBA4B
TUBA8
TUBAL3
TUBB1
TUBB2A
TUBB2B
TUBB3
TUBB4A
TUBB4B
TUBB6
TUBB8
TUBB8B
TUSC3
UAP1
UBA1
UBA52
UBB
UBC
UBE2J1
UBXN1
UGGT1
UGGT2
UMOD
USO1
VCAN
VCP
VEGFB
XXYLT1
YIPF1
YIPF2
YIPF6
YKT6
ZC3H12A

## Sheet: Supplmentray_table_2
	p_val	avg_log2FC	pct.1	pct.2	p_val_adj
DHCR24	0	0.337316	0.297	0.107	0
APOA2	0	2.79365	0.419	0.148	0
SERPINC1	0	1.60684	0.333	0.087	0
TOR1AIP2	0	0.436245	0.311	0.12	0
GLUL	0	1.08476	0.284	0.08	0
AGT	0	0.435143	0.508	0.22	0
APOB	0	0.617677	0.767	0.469	0
SPTBN1	0	0.388098	0.646	0.343	0
WDPCP	0	0.846488	0.499	0.264	0
AOX1	0	0.488066	0.498	0.245	0
AGXT	0	0.455998	0.635	0.349	0
ZNF385D	0	1.07778	0.292	0.108	0
ITIH1	0	0.478268	0.462	0.192	0
ST3GAL6	0	0.38678	0.382	0.161	0
TF	0	0.62404	0.643	0.386	0
AADAC	0	0.805178	0.266	0.075	0
AHSG	0	0.526779	0.423	0.175	0
HRG	0	0.941495	0.274	0.074	0
KNG1	0	0.800211	0.51	0.226	0
GC	0	1.01415	0.386	0.155	0
ADH1B	0	1.22549	0.461	0.208	0
FGA	0	0.428391	0.688	0.406	0
SELENOP	0	0.654714	0.464	0.21	0
F12	0	0.447653	0.6	0.313	0
IGFBP1	0	0.422928	0.751	0.467	0
CYP3A4	0	1.21747	0.703	0.432	0
AZGP1	0	0.361975	0.576	0.291	0
RARRES2	0	0.498351	0.339	0.112	0
TMEM176B	0	0.454544	0.314	0.117	0
CLU	0	0.595966	0.336	0.119	0
ALDH1A1	0	0.574435	0.284	0.092	0
GADD45G	0	0.380347	0.393	0.166	0
BAAT	0	0.525335	0.599	0.312	0
AMBP	0	1.41695	0.386	0.131	0
ORM1	0	0.628502	0.427	0.156	0
RBP4	0	1.73328	0.328	0.101	0
CYP2E1	0	0.637965	0.594	0.34	0
IFITM3	0	0.383352	0.326	0.116	0
HPX	0	0.395675	0.489	0.214	0
CAT	0	0.382298	0.262	0.089	0
SERPING1	0	0.518835	0.426	0.167	0
APOC3	0	1.16076	0.64	0.37	0
TMBIM6	0	0.549967	0.348	0.13	0
METTL7A	0	0.427292	0.324	0.123	0
MYL6	0	0.376529	0.303	0.105	0
ACSS3	0	0.49585	0.47	0.232	0
PEBP1	0	0.513614	0.413	0.16	0
UBC	0	0.67871	0.457	0.151	0
TPT1	0	0.393721	0.375	0.149	0
SERPINA1	0	0.472598	0.816	0.543	0
B2M	0	0.506921	0.39	0.176	0
GATM	0	0.705188	0.375	0.14	0
AQP9	0	0.483525	0.255	0.082	0
HP	0	0.707305	0.586	0.284	0
EIF1	0	0.488707	0.251	0.075	0
HLF	0	0.485496	0.424	0.195	0
SNHG25	0	0.413932	0.374	0.143	0
APOH	0	1.15701	0.583	0.316	0
P4HB	0	0.706065	0.281	0.08	0
DCXR	0	1.04824	0.349	0.087	0
CYB5A	0	0.377861	0.523	0.253	0
JUND	0	0.342367	0.518	0.257	0
CYP2A7	0	0.646173	0.308	0.101	0
APOE	0	2.38154	0.372	0.135	0
APOC1	0	1.55329	0.463	0.193	0
FTL	0	1.29511	0.323	0.105	0
SLC27A5	0	0.754299	0.382	0.13	0
COL18A1	0	0.394591	0.582	0.287	0
DDT	0	1.06268	0.273	0.06	0
ASGR2	4.20208e-307	0.328745	0.324	0.127	1.50165e-302
GPAM	3.86186e-306	0.400887	0.376	0.164	1.38007e-301
CES1	7.80059e-306	0.316572	0.454	0.214	2.78762e-301
SLC1A2	8.82246e-298	0.424323	0.298	0.115	3.15279e-293
C4BPB	1.34983e-297	0.281294	0.501	0.244	4.82374e-293
SLC2A2	2.04461e-297	0.421785	0.304	0.119	7.30661e-293
SULT2A1	6.61981e-297	0.382366	0.518	0.264	2.36566e-292
FGB	5.37967e-295	0.404217	0.695	0.415	1.92248e-290
F5	7.80247e-294	0.352381	0.741	0.439	2.78829e-289
ACOX1	1.26762e-292	0.384449	0.291	0.112	4.52996e-288
C1S	5.61512e-292	0.257546	0.475	0.227	2.00662e-287
PROC	9.51696e-291	0.272553	0.335	0.137	3.40098e-286
PDLIM1	3.97518e-289	0.389498	0.302	0.119	1.42057e-284
PTPRG	4.08822e-289	0.564999	0.515	0.278	1.46097e-284
ALDH1L1	2.6125e-288	0.36645	0.694	0.417	9.33605e-284
HAGH	2.20139e-286	0.341883	0.262	0.094	7.86689e-282
GMDS	1.77986e-285	0.370684	0.359	0.156	6.36051e-281
ECHDC2	2.27395e-285	0.308325	0.501	0.252	8.12617e-281
AR	5.07697e-282	0.356503	0.326	0.136	1.8143e-277
HLA-B	1.47345e-281	0.366332	0.293	0.115	5.26554e-277
ACTB	2.06308e-278	0.281241	0.258	0.092	7.37263e-274
CPB2	1.18511e-277	0.310259	0.491	0.247	4.23509e-273
TTC38	2.86386e-275	0.268154	0.316	0.129	1.02343e-270
ASPSCR1	4.03624e-275	0.260779	0.25	0.088	1.44239e-270
HSD17B6	1.82925e-273	0.341979	0.345	0.151	6.537e-269
C4BPA	4.83858e-269	0.302542	0.583	0.318	1.72911e-264
PROX1	1.01256e-265	0.32677	0.411	0.197	3.61847e-261
SEC31A	2.35532e-265	0.270509	0.342	0.148	8.41698e-261
RP11-798K3.2	4.21893e-263	0.352394	0.284	0.114	1.50768e-258
CADM1	1.5198e-262	0.481664	0.362	0.171	5.43116e-258
G6PC	7.79626e-262	0.344499	0.357	0.162	2.78607e-257
PAPSS2	3.43546e-254	0.301702	0.386	0.182	1.2277e-249
PRDX6	2.68237e-251	0.256614	0.265	0.103	9.58571e-247
HAO1	9.14365e-251	0.330457	0.284	0.117	3.26757e-246
APP	2.27925e-250	0.346747	0.312	0.135	8.14511e-246
AFMID	1.06898e-247	0.368999	0.271	0.11	3.82009e-243
SLC30A10	1.67182e-247	0.363331	0.295	0.126	5.9744e-243
RASAL2	1.42686e-243	0.429365	0.371	0.18	5.09904e-239
MIR100HG	1.91435e-243	0.399951	0.303	0.133	6.84114e-239
TLE1	6.58605e-243	0.287709	0.358	0.167	2.35359e-238
HSD17B4	3.86242e-240	0.263507	0.349	0.161	1.38028e-235
MLXIPL	4.86124e-240	0.260702	0.568	0.312	1.73721e-235
TRAK1	9.68211e-239	0.258391	0.281	0.116	3.46e-234
HPD	4.25158e-237	0.262924	0.607	0.347	1.51935e-232
NEDD4	1.40613e-226	0.262283	0.254	0.103	5.02494e-222
APOA1	2.94981e-224	0.378568	0.782	0.594	1.05415e-219
FGG	8.45201e-224	0.267222	0.674	0.401	3.02041e-219
C8B	2.3608e-220	0.263285	0.258	0.107	8.43654e-216
RHOBTB3	1.7024e-217	0.255933	0.285	0.126	6.08368e-213
CYP2A6	2.88335e-217	0.31672	0.517	0.295	1.03039e-212
COBLL1	2.40587e-216	0.293687	0.484	0.266	8.59761e-212
MST1	5.49759e-216	0.297797	0.411	0.214	1.96462e-211
GRB10	1.87174e-212	0.266883	0.395	0.201	6.68884e-208
TENM2	7.27281e-208	0.615072	0.365	0.193	2.59901e-203
PARD3B	9.38561e-207	0.263155	0.5	0.28	3.35404e-202
FTCD	8.91233e-205	0.390903	0.707	0.468	3.18491e-200
MAP3K13	9.70419e-192	0.251924	0.256	0.114	3.46789e-187
HGFAC	2.97624e-190	0.312701	0.384	0.207	1.06359e-185
ABCA6	2.9764e-189	0.264862	0.473	0.268	1.06365e-184
NEAT1	4.15361e-185	0.374049	0.954	0.844	1.48433e-180
ULK4	2.90448e-178	0.390038	0.445	0.252	1.03794e-173
MT2A	1.83406e-175	0.351712	0.649	0.439	6.5542e-171
GLYCTK	4.79723e-175	0.326179	0.411	0.235	1.71434e-170
PLPP1	7.48707e-145	0.309546	0.417	0.244	2.67558e-140
SLC13A5	3.59531e-143	0.300484	0.649	0.446	1.28482e-138
ZBTB20	1.64875e-105	0.396058	0.889	0.717	5.89196e-101
MYO9A	4.47015e-44	-0.256835	0.254	0.166	1.59745e-39
NKTR	9.21395e-42	-0.259006	0.455	0.307	3.2927e-37
SMAP2	7.82759e-39	-0.273663	0.269	0.181	2.79727e-34
MYO9B	3.54531e-38	-0.25756	0.283	0.191	1.26695e-33
SLC4A4	8.08169e-38	-0.261491	0.392	0.271	2.88807e-33
TRA2B	6.3955e-37	-0.256669	0.31	0.212	2.2855e-32
KIAA1551	1.00422e-36	-0.285573	0.264	0.179	3.58869e-32
WNK1	2.12313e-36	-0.254171	0.315	0.216	7.58723e-32
USP8	2.84158e-35	-0.250733	0.262	0.179	1.01547e-30
RNF213	1.65012e-33	-0.353409	0.365	0.251	5.89687e-29
EIF5B	1.00969e-32	-0.280685	0.266	0.184	3.60824e-28
MPHOSPH8	5.69832e-32	-0.279342	0.279	0.194	2.03635e-27
SLTM	2.01839e-30	-0.294273	0.278	0.194	7.21292e-26
ROCK1	2.11336e-30	-0.270198	0.282	0.197	7.55229e-26
ZNF292	1.91444e-29	-0.252675	0.263	0.185	6.84146e-25
NEMF	5.08058e-28	-0.273015	0.326	0.23	1.8156e-23
RNF149	1.17965e-27	-0.262044	0.252	0.178	4.21561e-23
KIAA1109	1.33152e-26	-0.281622	0.313	0.223	4.75831e-22
DDX46	1.9966e-26	-0.259233	0.271	0.193	7.13506e-22
PHIP	1.03722e-25	-0.301866	0.284	0.202	3.7066e-21
SCAF11	1.71306e-25	-0.288707	0.369	0.264	6.12178e-21
VPS13C	4.37773e-25	-0.306221	0.3	0.214	1.56443e-20
TPR	1.63417e-24	-0.271268	0.275	0.198	5.83989e-20
CCAR1	8.34593e-24	-0.274021	0.279	0.201	2.9825e-19
ARGLU1	2.13331e-23	-0.296839	0.359	0.26	7.62361e-19
TRA2A	6.08566e-22	-0.276483	0.278	0.202	2.17477e-17
SCLT1	8.68518e-22	-0.286723	0.276	0.203	3.10374e-17
FNBP1	1.91797e-21	-0.322126	0.277	0.201	6.85407e-17
CDC42SE2	9.02967e-21	-0.320975	0.273	0.2	3.22684e-16
COMMD10	6.75553e-20	-0.272316	0.491	0.355	2.41416e-15
RB1	8.45661e-20	-0.306184	0.254	0.187	3.02206e-15
PKHD1	5.2508e-17	-0.356636	0.365	0.278	1.87642e-12
PCM1	6.13346e-16	-0.338794	0.368	0.273	2.19185e-11
MYCBP2	1.95164e-15	-0.34785	0.323	0.241	6.97437e-11
KYNU	4.16454e-15	-0.263398	0.263	0.201	1.48824e-10
SAT1	8.16559e-15	-0.301096	0.708	0.521	2.91806e-10
PLXDC2	9.38191e-15	-0.291182	0.283	0.217	3.35272e-10
ITSN1	1.26141e-14	-0.28565	0.455	0.341	4.50777e-10
KDM5A	7.76619e-14	-0.326136	0.255	0.194	2.77533e-09
ATM	8.53081e-14	-0.44292	0.285	0.214	3.04857e-09
BAZ2B	1.68075e-13	-0.320043	0.463	0.342	6.00634e-09
PARP14	4.31936e-13	-0.386125	0.332	0.251	1.54357e-08
AKAP12	1.63813e-12	-0.412835	0.25	0.197	5.85403e-08
BOD1L1	8.78663e-12	-0.386352	0.271	0.208	3.13999e-07
BAZ1B	1.18971e-11	-0.367587	0.26	0.2	4.25155e-07
PPIG	3.1498e-11	-0.357879	0.347	0.265	1.12561e-06
FCHSD2	1.00268e-10	-0.276817	0.495	0.376	3.58317e-06
KMT2E	1.06087e-10	-0.393356	0.353	0.268	3.79112e-06
ANKRD11	1.56823e-10	-0.27389	0.543	0.408	5.60421e-06
ATRX	3.40113e-10	-0.336261	0.481	0.359	1.21543e-05
LUC7L3	3.64933e-10	-0.359826	0.461	0.343	1.30413e-05
RBM25	6.50866e-10	-0.385358	0.417	0.316	2.32593e-05
SMCHD1	8.09002e-10	-0.392374	0.319	0.247	2.89105e-05
SON	1.92954e-09	-0.346889	0.503	0.376	6.89542e-05
HERC1	3.45021e-09	-0.32362	0.518	0.388	0.000123297
CCND3	1.06489e-08	-0.40703	0.25	0.198	0.000380551
LINGO1	2.92598e-08	0.29037	0.331	0.319	0.00104563
GCC2	1.3842e-06	-0.392394	0.356	0.28	0.0494656

## Sheet: Supplmentray_table_3
probes	moduleColor
LMNB2	blue
RORA	blue
ACAT1	blue
KLF9	blue
SAPCD2	blue
PDK4	blue
CEP55	blue
CPEB3	blue
MYBL2	blue
PAFAH1B3	blue
SERPING1	blue
H2AX	blue
G6PD	blue
KIF2C	blue
DEPDC1B	blue
KCNJ8	blue
AC136601.2	blue
PIMREG	blue
PINK1	blue
SYBU	blue
ESR1	blue
ZBTB16	blue
CDCA7	blue
GTSE1	blue
TACC3	blue
UBE2C	blue
ABCA8	blue
RNF125	blue
RDH5	blue
OGDHL	blue
CDC20	blue
LRRC1	blue
BTNL9	blue
PRR11	blue
AURKB	blue
RCL1	blue
CTSO	blue
RCAN1	blue
CENPA	blue
PLK1	blue
ADRA1B	blue
CCNB1	blue
HMGA1	blue
CLYBL	blue
CKS2	blue
TROAP	blue
TRIP13	blue
MKI67	blue
AC023090.1	blue
SNHG3	blue
KIF18B	blue
NRM	blue
HJURP	blue
RPL8	blue
DHODH	blue
RPS12	blue
NUF2	blue
ASF1B	blue
CDK1	blue
PTTG1	blue
BIRC5	blue
CENPM	blue
SLC6A13	blue
CCNB2	blue
CENPF	blue
KIFC1	blue
NT5DC2	blue
ARID3A	blue
CDC6	blue
CENPW	blue
KIF20A	blue
UBE2T	blue
CSAD	blue
IGF2BP2	blue
CDCA5	blue
ANLN	blue
TPX2	blue
CDT1	blue
CYP39A1	blue
DNASE1L3	blue
NLRP6	blue
GADD45G	blue
TMEM47	blue
CDCA8	blue
SKA1	blue
TOP2A	blue
GABARAPL1	blue
DUSP9	blue
CYP7B1	blue
KCNB1	blue
IL4I1	blue
CLEC3B	blue
KIF4A	blue
AFP	blue
NEK2	blue
SLC1A1	blue
GNAO1	blue
FABP4	blue
BOK	blue
IGF2BP1	blue
NEURL3	blue
RAMP3	blue
TRIM71	blue
SOCS2	blue
KCND3	blue
FOXM1	blue
PLBD1	blue
TSC22D3	blue
PPARGC1A	blue
ELFN1	blue
LINC02716	blue
MDK	blue
SPATC1L	blue
GNAZ	blue
NDRG1	blue
RBP7	blue
TMOD1	blue
LRCOL1	blue
LCAT	blue
LAPTM4B	blue
TRIM31	blue
MEP1A	blue
C7	blue
IFIT1	grey
RAMP1	grey
RETREG1	grey
DQX1	grey
DEFB132	grey
DKK1	grey
SULT1C2	grey
PKIB	grey
FCN2	grey
MROH2A	grey
SLC29A4	grey
DBNDD1	grey
ANGPTL4	grey
IGFBP3	grey
TFF2	grey
S100P	grey
PRAMEF10	grey
C19orf33	grey
NTS	grey
CA2	grey
EPO	grey
SCUBE1	grey
MT1X	grey
BEX2	grey
AL162582.1	grey
TFF1	grey
OLFM2	grey
ALPL	grey
MSI1	grey
EFHD1	grey
VIL1	grey
FAM83A-AS1	grey
BPIFB2	grey
PEG10	grey
UGT2B17	grey
PRR15L	grey
FDCSP	grey
LINC00659	grey
FOXQ1	grey
TFF3	grey
SLC39A4	grey
S100A9	grey
PIGR	grey
MUC5B	grey
UGT3A1	grey
UPK3A	grey
H19	grey
IFI27	grey
PFN1P11	grey
CYP17A1	grey
BCHE	grey
MT1A	grey
CA12	grey
APCS	grey
FGF21	grey
DLK1	grey
PDZK1IP1	grey
ACSL4	grey
LAD1	grey
CDHR2	grey
DHRS2	grey
SPINK1	grey
GSTM1	grey
HGFAC	grey
CLDN4	grey
IGHG4	grey
IGKC	grey
IGHG3	grey
IGHG1	grey
PGC	grey
MT1E	grey
KRT23	grey
IGHG2	grey
IGLC2	grey
GPC3	grey
RPS4Y1	grey
MT1G	grey
IGF2	grey
SLC10A1	turquoise
SLC27A5	turquoise
GLYAT	turquoise
GLYATL1	turquoise
ACSM2A	turquoise
TAT	turquoise
ABCA6	turquoise
CYP8B1	turquoise
CYB5A	turquoise
PFKFB1	turquoise
PCK2	turquoise
GYS2	turquoise
CYP4F2	turquoise
RTP3	turquoise
AQP9	turquoise
CES2	turquoise
SEC14L2	turquoise
ABCB4	turquoise
FMO4	turquoise
ALDH2	turquoise
DMGDH	turquoise
LINC01018	turquoise
ACSM2B	turquoise
ASPDH	turquoise
EHHADH	turquoise
CYP2A6	turquoise
HSD17B6	turquoise
ABCB11	turquoise
CLIC1	turquoise
AR	turquoise
LINC01485	turquoise
SAR1B	turquoise
SRD5A1	turquoise
ABAT	turquoise
NR1I2	turquoise
MPDZ	turquoise
MTHFD1	turquoise
HAGH	turquoise
AKR1C6P	turquoise
ACSM5	turquoise
GRHPR	turquoise
TLCD4	turquoise
TTC36	turquoise
SLC27A2	turquoise
RCC2	turquoise
ADH1B	turquoise
LDHD	turquoise
DAO	turquoise
ACADL	turquoise
SLC22A1	turquoise
HSD11B1	turquoise
DHTKD1	turquoise
ALDH6A1	turquoise
ALDH5A1	turquoise
MFSD10	turquoise
CYP3A4	turquoise
SCP2	turquoise
OTC	turquoise
TMSB10	turquoise
PKM	turquoise
HAO1	turquoise
MYO1B	turquoise
ST3GAL6	turquoise
IYD	turquoise
ETNPPL	turquoise
IL27	turquoise
HPD	turquoise
ADI1	turquoise
CYP4A22	turquoise
GPLD1	turquoise
BDH1	turquoise
INSIG1	turquoise
LONP2	turquoise
PEX11G	turquoise
UGT2B10	turquoise
DEPDC7	turquoise
BMERB1	turquoise
SORD	turquoise
PCK1	turquoise
ECM2	turquoise
ADHFE1	turquoise
TPRG1-AS1	turquoise
CAT	turquoise
CCND2P1	turquoise
RDH16	turquoise
LINC02768	turquoise
ECHDC2	turquoise
F13B	turquoise
ACBD4	turquoise
AC012313.9	turquoise
GADD45A	turquoise
DCXR	turquoise
CDO1	turquoise
ADORA2BP1	turquoise
NR1I3	turquoise
CYP2C8	turquoise
C8A	turquoise
TM6SF2	turquoise
CYP4F3	turquoise
IVD	turquoise
F11	turquoise
MOGAT2	turquoise
TSKU	turquoise
SERPINC1	turquoise
UPB1	turquoise
HPR	turquoise
ACAA2	turquoise
SLC16A2	turquoise
HSD17B4	turquoise
CFHR4	turquoise
IGSF23	turquoise
PIPOX	turquoise
GCDH	turquoise
APOA5	turquoise
ABCC6	turquoise
ACOX2	turquoise
LINC00844	turquoise
TTPA	turquoise
ETNK2	turquoise
ETFDH	turquoise
AP000445.1	turquoise
ACOX1	turquoise
GBA3	turquoise
AC021146.9	turquoise
SRD5A2	turquoise
ALDH7A1	turquoise
HAAO	turquoise
UGT1A4	turquoise
MASP1	turquoise
CCL16	turquoise
MAT1A	turquoise
CYP4A11	turquoise
RIDA	turquoise
METTL7A	turquoise
C6	turquoise
AKR7A3	turquoise
ALDH1L1	turquoise
SLCO2B1	turquoise
CTH	turquoise
AL161668.4	turquoise
QDPR	turquoise
SHMT1	turquoise
CADM1	turquoise
SORBS2	turquoise
PXMP2	turquoise
PGRMC1	turquoise
STBD1	turquoise
DHRS1	turquoise
CD14	turquoise
FMO3	turquoise
F11-AS1	turquoise
PLG	turquoise
ZMYND12	turquoise
RUNDC3B	turquoise
ARHGEF2	turquoise
AC004832.5	turquoise
DPYS	turquoise
CYP2C9	turquoise
NUDT7	turquoise
FETUB	turquoise
SLC46A3	turquoise
AZGP1P2	turquoise
C3P1	turquoise
MYLK	turquoise
CPN2	turquoise
CPT2	turquoise
KCTD17	turquoise
CPED1	turquoise
SELENBP1	turquoise
SULT2A1	turquoise
BHMT	turquoise
CYP2J2	turquoise
TEAD2	turquoise
DSG1	turquoise
PON3	turquoise
EPHX2	turquoise
CYP2B6	turquoise
BTD	turquoise
BAAT	turquoise
MARCKSL1	turquoise
CES4A	turquoise
A1BG	turquoise
KAT2B	turquoise
ACKR2	turquoise
AASS	turquoise
CYP4F11	turquoise
SPDYC	turquoise
SLC1A5	turquoise
SLC25A15	turquoise
SLC28A1	turquoise
SARDH	turquoise
ADRB2	turquoise
AP001783.1	turquoise
POR	turquoise
CUX2	turquoise
MASP2	turquoise
ACOT12	turquoise
ALAS1	turquoise
HNF4A-AS1	turquoise
SMIM14	turquoise
AL354872.1	turquoise
HGD	turquoise
MTARC2	turquoise
MARCKS	turquoise
COLCA2	turquoise
ADH1C	turquoise
FGGY	turquoise
SH3BP1	turquoise
TMEM220-AS1	turquoise
FAH	turquoise
ALAD	turquoise
LINC02037	turquoise
FNDC5	turquoise
TYRO3	turquoise
CYP2A7	turquoise
RPS19	turquoise
UGT2B7	turquoise
SPHK1	turquoise
CRYL1	turquoise
GPT2	turquoise
RGN	turquoise
AC021074.3	turquoise
GAL3ST1	turquoise
NAT2	turquoise
F9	turquoise
ACADM	turquoise
BPHL	turquoise
CFHR2	turquoise
UGP2	turquoise
HSD17B8	turquoise
AGXT2	turquoise
EPHX1	turquoise
SLC2A2	turquoise
LPCAT1	turquoise
CGNL1	turquoise
PNPO	turquoise
ADH4	turquoise
ALDOA	turquoise
TMC6	turquoise
XDH	turquoise
PPARA	turquoise
ABCG2	turquoise
MFAP3L	turquoise
CA9	turquoise
SLC6A1	turquoise
SLCO1B1	turquoise
KLF15	turquoise
CDC14B	turquoise
DCXR-DT	turquoise
SORL1	turquoise
BCKDHB	turquoise
AGMO	turquoise
IKBKE	turquoise
AC006329.1	turquoise
LIPG	turquoise
APOC4	turquoise
MYRIP	turquoise
PNMA1	turquoise
SORD2P	turquoise
GPD1	turquoise
HOMER2	turquoise
AC008537.3	turquoise
AC010336.2	turquoise
NUGGC	turquoise
UGT2B15	turquoise
TRO	turquoise
GBP7	turquoise
SOX4	turquoise
MAPK13	turquoise
TMEM51	turquoise
AZGP1	turquoise
PAH	turquoise
TFR2	turquoise
AC079360.1	turquoise
SLC13A5	turquoise
SLC22A25	turquoise
RNASE4	turquoise
SLC51A	turquoise
AC244394.2	turquoise
KNG1	turquoise
APBA1	turquoise
KLKB1	turquoise
TTR	turquoise
PITX1	turquoise
AFM	turquoise
CPB2	turquoise
AC099508.2	turquoise
ACSL1	turquoise
COBLL1	turquoise
LINC02362	turquoise
PC	turquoise
AC004862.1	turquoise
GNE	turquoise
CES3	turquoise
AP003119.3	turquoise
CYP4V2	turquoise
LINC02754	turquoise
ABCG8	turquoise
OSGIN1	turquoise
INSIG1-DT	turquoise
ENTPD5	turquoise
F12	turquoise
APOF	turquoise
AADAC	turquoise
ITPR2	turquoise
AP001065.3	turquoise
SYTL4	turquoise
ENPEP	turquoise
SC5D	turquoise
PON1	turquoise
HRG	turquoise
PANK1	turquoise
ADH6	turquoise
FRAS1	turquoise
MTHFS	turquoise
HSD17B13	turquoise
SERPINH1	turquoise
THRSP	turquoise
AMDHD1	turquoise
CMBL	turquoise
AC020978.4	turquoise
AKR1D1	turquoise
ARID3C	turquoise
AC015908.3	turquoise
AP006216.2	turquoise
AC008549.1	turquoise
C1S	turquoise
AC009166.1	turquoise
CYP7A1	turquoise
HLF	turquoise
AZGP1P1	turquoise
SMOX	turquoise
ACAA1	turquoise
UGT1A3	turquoise
HPX	turquoise
ANXA10	turquoise
SLC41A2	turquoise
TKFC	turquoise
SLC6A12	turquoise
COL9A2	turquoise
WNK3	turquoise
HJV	turquoise
CYBA	turquoise
AGXT	turquoise
SLC47A1	turquoise
CBR1	turquoise
MYCL	turquoise
GFRA1	turquoise
AC137723.1	turquoise
DBN1	turquoise
LINC01093	turquoise
GNMT	turquoise
AL109933.4	turquoise
SLC17A4	turquoise
LRRC2	turquoise
G6PC	turquoise
CYP27A1	turquoise
LRRC37A7P	turquoise
CLSTN1	turquoise
SLC30A1	turquoise
ABHD6	turquoise
ABCG5	turquoise
RBP5	turquoise
HAO2	turquoise
FAXDC2	turquoise
S100A11	turquoise
DIO1	turquoise
GSTZ1	turquoise
PALMD	turquoise
WNK2	turquoise
GSTA7P	turquoise
SELENOP	turquoise
SALL2	turquoise
SLC38A4	turquoise
MTND4P20	turquoise
SERPINA10	turquoise
ABCC9	turquoise
GPT	turquoise
ACADSB	turquoise
NCK2	turquoise
SPP2	turquoise
NEDD4	turquoise
C8B	turquoise
IMPDH1	turquoise
MSMO1	turquoise
LAMA5-AS1	turquoise
SLC1A2	turquoise
GLYCTK	turquoise
FUOM	turquoise
CYP1A2	turquoise
ACMSD	turquoise
NAGS	turquoise
SOWAHB	turquoise
ANGPTL3	turquoise
RBP4	turquoise
GHR	turquoise
SRC	turquoise
TMEM220	turquoise
HOMER3	turquoise
LINC01702	turquoise
CTNND2	turquoise
PECR	turquoise
PCSK6	turquoise
CPS1	turquoise
ACY3	turquoise
AADAT	turquoise
FBP1	turquoise
ANG	turquoise
MIR621	turquoise
SLC16A3	turquoise
CD302	turquoise
PRKAG2-AS1	turquoise
EVA1A	turquoise
MACROH2A2	turquoise
ALDH8A1	turquoise
LPAR2	turquoise
HP	turquoise
MGST1	turquoise
LEPR	turquoise
ITIH1	turquoise
TIGD2	turquoise
ENPP7	turquoise
C4BPA	turquoise
KHK	turquoise
CLDN14	turquoise
AC112206.2	turquoise
ITM2C	turquoise
HID1	turquoise
CES1	turquoise
PLEKHB1	turquoise
BHMT2	turquoise
SLC25A25	turquoise
TM7SF2	turquoise
CD24	turquoise
ADH1A	turquoise
LINC00261	turquoise
CYP3A43	turquoise
SLC7A1	turquoise
AC239800.2	turquoise
PLGLA	turquoise
OASL	turquoise
UBXN10	turquoise
APOC3	turquoise
PAPPA2	turquoise
Z97056.1	turquoise
LRRC3	turquoise
DMKN	turquoise
RORC	turquoise
LINC01554	turquoise
TNFRSF21	turquoise
ENO2	turquoise
PHYH	turquoise
MFSD2A	turquoise
CFHR5	turquoise
TMEM132A	turquoise
UGT1A2P	turquoise
UGT2B27P	turquoise
IRF6	turquoise
MELTF	turquoise
AADACP1	turquoise
RNU1-70P	turquoise
LINC01127	turquoise
ALDOB	turquoise
TTC39C	turquoise
PROZ	turquoise
LPA	turquoise
AOC4P	turquoise
TAX1BP3	turquoise
BANF1P2	turquoise
NRSN2	turquoise
PAPSS2	turquoise
AC063919.1	turquoise
MTTP	turquoise
LINC02499	turquoise
AL360181.1	turquoise
PRAME	turquoise
INHBC	turquoise
ANO1	turquoise
CHAD	turquoise
PHYHD1	turquoise
EGLN3	turquoise
TMED3	turquoise
C3orf85	turquoise
TESC	turquoise
MISP	turquoise
MST1	turquoise
GATM	turquoise
TGFBR3L	turquoise
HMGCS2	turquoise
NECAB2	turquoise
CYP11A1	turquoise
F5	turquoise
TMSB4X	turquoise
SLC25A42	turquoise
BMF	turquoise
AL138847.2	turquoise
MGC32805	turquoise
ADRA1A	turquoise
AC006254.1	turquoise
SLC6A8	turquoise
ATP6V0E2	turquoise
CA5A	turquoise
SDS	turquoise
VEGFB	turquoise
AL359893.1	turquoise
CFHR3	turquoise
LINC02608	turquoise
F7	turquoise
FOXJ1	turquoise
AP001880.2	turquoise
GCKR	turquoise
LECT2	turquoise
IL6R	turquoise
FXYD2	turquoise
BX842568.3	turquoise
PBLD	turquoise
HORMAD2-AS1	turquoise
PROC	turquoise
AC005336.1	turquoise
DDR1	turquoise
RGS2	turquoise
TRNP1	turquoise
TMEM82	turquoise
PKLR	turquoise
SLC38A1	turquoise
TMEM150C	turquoise
S100A6	turquoise
TMPRSS6	turquoise
SLC38A3	turquoise
PDE9A	turquoise
TRPM8	turquoise
UAP1L1	turquoise
AGR2	turquoise
ACOT1	turquoise
UGT1A1	turquoise
GLS2	turquoise
MMP11	turquoise
KCNJ4	turquoise
PRAP1	turquoise
GSTA2	turquoise
EPS8L3	turquoise
CYP2A13	turquoise
AP000355.1	turquoise
HAGLR	turquoise
ZNF385B	turquoise
ACSS3	turquoise
MLXIPL	turquoise
AC087482.1	turquoise
ALDH1A1	turquoise
FOLH1	turquoise
ARG1	turquoise
ASL	turquoise
NXPH4	turquoise
IGFBP2	turquoise
ADORA2A-AS1	turquoise
LEAP2	turquoise
LINC02041	turquoise
CYP2B7P	turquoise
AOX1	turquoise
AC115619.1	turquoise
CYP2D6	turquoise
AMACR	turquoise
PYCR1	turquoise
GSTA1	turquoise
CYP2D7	turquoise
SLC2A12	turquoise
IER3	turquoise
ITPR3	turquoise
DPP4	turquoise
FOLH1B	turquoise
CRYM	turquoise
SEPTIN4	turquoise
ITIH3	turquoise
AC099677.1	turquoise
SNAP25	turquoise
GCGR	turquoise
ACSM3	turquoise
SERPINA4	turquoise
ACSL5	turquoise
UGT2B4	turquoise
SULT1B1	turquoise
SLC25A47	turquoise
MMP9	turquoise
FMO5	turquoise
CYP1A1	turquoise
SAA4	turquoise
CDHR5	turquoise
KRT19	turquoise
SEL1L3	turquoise
PTP4A3	turquoise
SGPP2	turquoise
PHLDA2	turquoise
ECHDC3	turquoise
ZG16	turquoise
MIR1295A	turquoise
COL5A3	turquoise
SOX9	turquoise
SHD	turquoise
AKR1C4	turquoise
AC025423.3	turquoise
HK2	turquoise
QSOX1	turquoise
C4BPB	turquoise
LINC02381	turquoise
ESPN	turquoise
SERPIND1	turquoise
USP30-AS1	turquoise
PLPP2	turquoise
AC016735.1	turquoise
KMO	turquoise
FTCD	turquoise
LYPD1	turquoise
RAP1GAP	turquoise
CCDC170	turquoise
SMIM22	turquoise
SULT1A1	turquoise
UPP2	turquoise
MIR135A1	turquoise
C1orf116	turquoise
CYP3A5	turquoise
LINC01595	turquoise
ASNS	turquoise
SERPINA11	turquoise
ACSM1	turquoise
SERPINA6	turquoise
C4orf48	turquoise
TREH	turquoise
PTK7	turquoise
FGFR3	turquoise
FKBP10	turquoise
SULT1A2	turquoise
HSD11B1-AS1	turquoise
ETV4	turquoise
BBOX1	turquoise
SPINT1	turquoise
HS1BP3-IT1	turquoise
RIPPLY1	turquoise
PLP2	turquoise
MBL2	turquoise
SLC17A2	turquoise
B3GNT3	turquoise
CXCL5	turquoise
LINC01151	turquoise
PCSK1N	turquoise
LIVAR	turquoise
MUC1	turquoise
REEP6	turquoise
CAPG	turquoise
SLC17A1	turquoise
TGFB1	turquoise
FXYD3	turquoise
CNDP1	turquoise
LIF	turquoise
FCAMR	turquoise
F2	turquoise
KDM8	turquoise
SELENOM	turquoise
AC007423.1	turquoise
LGALS3BP	turquoise
TDO2	turquoise
TMC5	turquoise
APOC1P1	turquoise
SPARCL1	turquoise
AL355102.4	turquoise
PFKP	turquoise
RAB34	turquoise
CHRNA4	turquoise
BICC1	turquoise
CCL20	turquoise
ABCC2	turquoise
KIF12	turquoise
CTHRC1	turquoise
EPCAM	turquoise
BAIAP2L2	turquoise
ABCB1	turquoise
DGAT2	turquoise
LINC02428	turquoise
TTC9	turquoise
ARRDC4	turquoise
CFH	turquoise
MAL2	turquoise
LTB	turquoise
S100A4	turquoise
SLC22A7	turquoise
STEAP3	turquoise
PTGR1	turquoise
CES1P1	turquoise
MMP12	turquoise
CYP2C18	turquoise
APOB	turquoise
NPTX2	turquoise
H2AW	turquoise
GREM2	turquoise
CLDN15	turquoise
GPAM	turquoise
C12orf75	turquoise
RPL12P14	turquoise
ITIH5	turquoise
TCEAL9	turquoise
SLC34A2	turquoise
AHSG	turquoise
FBLN1	turquoise
IL2RG	turquoise
SMIM32	turquoise
GOLM1	turquoise
SLC22A10	turquoise
ELOVL7	turquoise
SAA1	turquoise
LINC01348	turquoise
SAA2-SAA4	turquoise
LIPC	turquoise
FBXO2	turquoise
LDOC1	turquoise
SLC25A18	turquoise
UGT1A9	turquoise
APOH	turquoise
IGFBP1	turquoise
PRODH2	turquoise
S100A14	turquoise
DDC	turquoise
SAA2	turquoise
AVPR1A	turquoise
UCHL1	turquoise
PANX2	turquoise
HEPACAM	turquoise
SERPINF2	turquoise
UROC1	turquoise
AKR1C2	turquoise
CP	turquoise
SLC16A11	turquoise
FXYD1	turquoise
PGLYRP2	turquoise
AC084375.1	turquoise
DCDC2	turquoise
FAM99A	turquoise
PAGE4	turquoise
GCK	turquoise
CFHR1	turquoise
FGA	turquoise
KRT17P8	turquoise
BACE2	turquoise
MME	turquoise
CLDN2	turquoise
ANXA13	turquoise
SLC22A12	turquoise
TF	turquoise
TRIM55	turquoise
PI3	turquoise
TIMP1	turquoise
HKDC1	turquoise
SUSD4	turquoise
APOA2	turquoise
FGG	turquoise
SPP1	turquoise
ALB	turquoise
SPINT2	turquoise
NOTUM	turquoise
C9	turquoise
SYT7	turquoise
CXCL1	turquoise
SHBG	turquoise
MMP7	turquoise
APOA1	turquoise
SLC13A3	turquoise
SERPINA7	turquoise
CYP2E1	turquoise
ALDH3A1	turquoise

## Sheet:  Supplmentray_table_4
gene	Forward primer	Reverse primer
Spp1	ATCTCACCATTCGGATGAGTCT	TGTAGGGACGATTGGAGTGAAA
Socs2	AGTTCGCATTCAGACTACCTACT	TGGTACTCAATCCGCAGGTTAG
Sapcd2	CGCGGATTTGGGCTCTTCT	CTTGTGCTAGGTGCTCCTGT
S100a9	ATACTCTAGGAAGGAAGGACACC	TCCATGATGTCATTTATGAGGGC
Ramp3	GTGAGTGTGCCCAGGTATGC	AGGTTGCACCACTTCCAGAC
Csad	CCAGGACGTGTTTGGGATTGT	CTCCTTCCATTCGCAGACCTT

## Sheet:  Supplmentray_table_5
REAGENT or RESOURCE	SOURCE	IDENTIFIER
Antibodies
Anti-human OPN antibody	Santa cruz	sc-21742
Anti-human S100A9 antibody	Abcam	ab22506
Anti-human RAMP3 antibody	Abcam	ab58660
DAPI	Beyotime	P0131
Biological samples
HCC samples	ShuGuang Hospital Affiliated to Shanghai University of Traditional Chinese Medicine	N/A
Adjacent normal tissues from HCC patients	ShuGuang Hospital Affiliated to Shanghai University of Traditional Chinese Medicine	N/A
